# Supplementary material for: A reversible Hg(ii)-selective fluorescent chemosensor based on a thioether linked bis-rhodamine
Source: Royal Society of Chemistry journal article supplement (doi:10.1039/c3ra43675f), 2013-01-01
Supplement: c3ra43675f.pdf [file c3ra43675f.pdf]

## Electronic Supplementary Information

for

### A reversible Hg<sup>2+</sup>-selective fluorescent chemosensor based on a thioether linked bis-rhodamine

Xuan Zhang\*, Xiao-Juan Huang and Zhi-Jia Zhu

*College of Chemistry, Chemical Engineering & Biotechnology, Donghua University, Shanghai 201620, China; and Key Laboratory of Science & Technology of Eco-Textile (Donghua University/Jiangnan University), Ministry of Education, China.*

*e-mail: xzhang@dhu.edu.cn*

#### Materials and Methods

Rhodamine B, POCl<sub>3</sub>, 2-bromoethylamine, Na<sub>2</sub>S and all organic solvents (analytical grade) were purchased from Sinopharm Chemical Reagents Co. (Shanghai) and used as received. The stock solution of sensor **1** (1 mM) was prepared in EtOH and the working solution was obtained by dilution with HCl-Tris buffer solution (pH 7.4).

ESI-MS and MALDI-TOF-MS spectra were obtained on a Varian 310 and AB Sciex TOF/TOF<sup>TM</sup> mass spectrometer, respectively. <sup>1</sup>H NMR and <sup>13</sup>C NMR spectra were recorded on a Bruker AVANCE III 400 MHz spectrometer with TMS as standard. Fluorescence spectra were recorded on a Hitachi F-7000 Fluorescence spectrometer (Ex/Em slit widths: 2.5 nm). Absorption spectra were measured on a Persee TU-1901 spectrophotometer. The measurements were carried out with a 1 cm path length quartz cell. The pH was measured by using Mettler Toledo pH Meter.

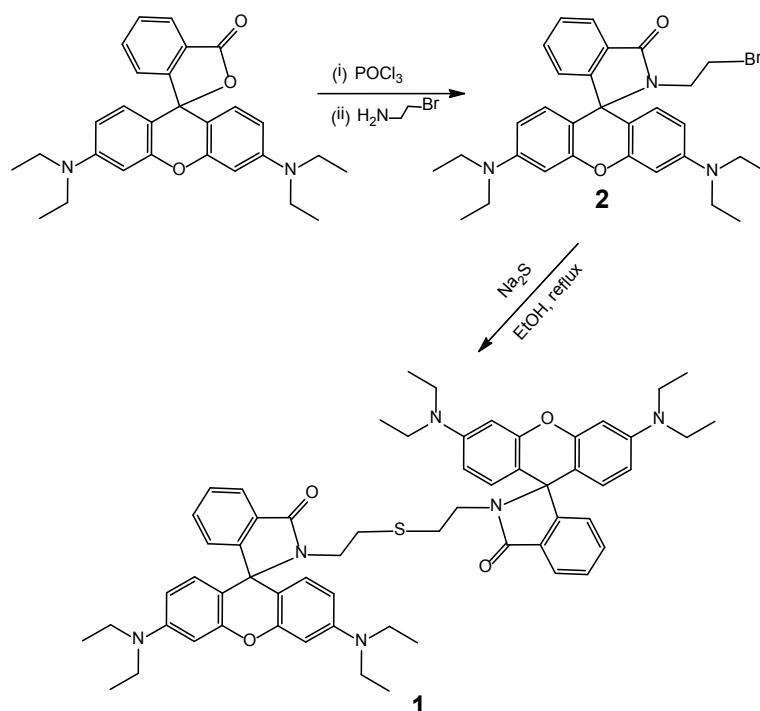

### Synthesis of **1**

**2** (100 mg) and  $\text{Na}_2\text{S}$  (500 mg) were dissolved in 20 mL EtOH and refluxed for 6h. The solvent was evaporated in vacuum and the residue was purified by column chromatography (silica gel, acetone/hexane = 1/5, v/v). Then 10 mg pure **1** was obtained as white powder.  $^1\text{H}$  NMR (400MHz,  $\text{CDCl}_3$ ),  $\delta$  (ppm): 8.16 (t,  $J = 4.0\text{Hz}$ , 2H), 7.51 (t,  $J = 4.0\text{Hz}$ , 4H), 7.12 (d,  $J = 4.0\text{Hz}$ , 2H), 6.42 (d,  $J = 8.0\text{Hz}$ , 8H), 6.32 (d,  $J = 8.0\text{Hz}$ , 4H), 3.78 (t,  $J = 6.0\text{Hz}$ , 4H), 3.44 (t,  $J = 6.0\text{Hz}$ , 4H), 3.37 (q,  $J = 8.0\text{Hz}$ , 16H), 1.19 (t,  $J = 6.0\text{Hz}$ , 24H);  $^{13}\text{C}$  NMR (100 MHz,  $\text{CDCl}_3$ ),  $\delta$  (ppm): 165.93, 152.95, 151.00, 148.96, 137.30, 132.33, 128.64, 125.03, 123.00, 122.02, 108.39, 73.69, 62.03, 47.43, 44.11, 29.44, 12.43. MALDI-TOF-MS ( $\text{M}+\text{H}$ ) $^+$ :  $m/z$  calcd 969.5; found 969.2.

The intermediate **2** was synthesized according to a previous reported procedure (Reference : X.

Zhang, Y. Shiraishi and T. Hirai, *Tetrahedron Lett.*, 2008, **49**, 4178–4181).

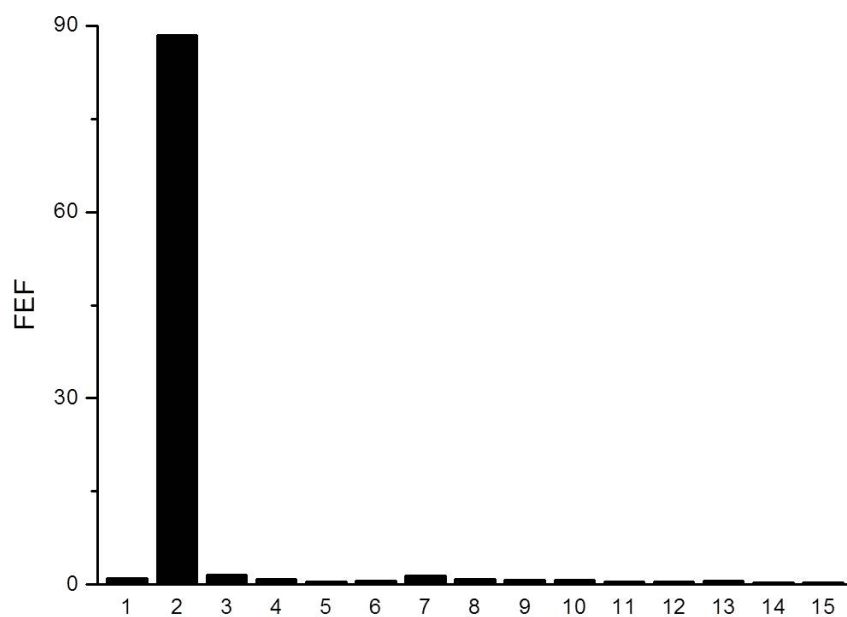

**Figure S1.** Fluorescence enhancement factor (FEF) of **1** (10  $\mu\text{M}$ ) in the presence of various metal cations (4 equiv. for  $\text{Hg}^{2+}$  and 40 equiv for other metal cations). in HCl-Tris buffer solution (pH = 7.4). 1: **1** only; 2:  $\text{Hg}^{2+}$ ; 3:  $\text{Fe}^{3+}$ ; 4:  $\text{Fe}^{2+}$ ; 5:  $\text{Co}^{2+}$ ; 6:  $\text{Ni}^{2+}$ ; 7:  $\text{Cu}^{2+}$ ; 8:  $\text{Zn}^{2+}$ ; 9:  $\text{Cd}^{2+}$ ; 10:  $\text{Pb}^{2+}$ ; 11:  $\text{Ca}^{2+}$ ; 12:  $\text{Mg}^{2+}$ ; 13:  $\text{Ag}^{+}$ ; 14:  $\text{K}^{+}$ ; 15:  $\text{Na}^{+}$ .

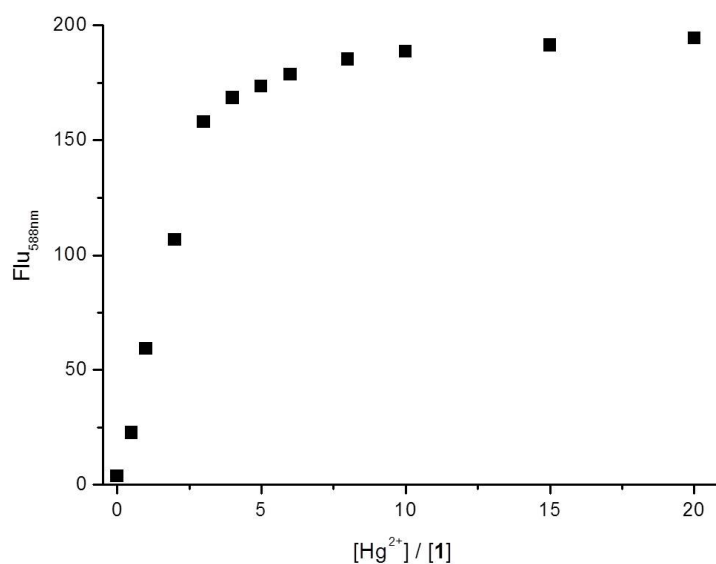

**Figure S2.** The plot of fluorescence intensity (588 nm) of **1** (10  $\mu\text{M}$ ) to  $\text{Hg}^{2+}$  concentration in HCl-Tris buffer solution (pH = 7.4).

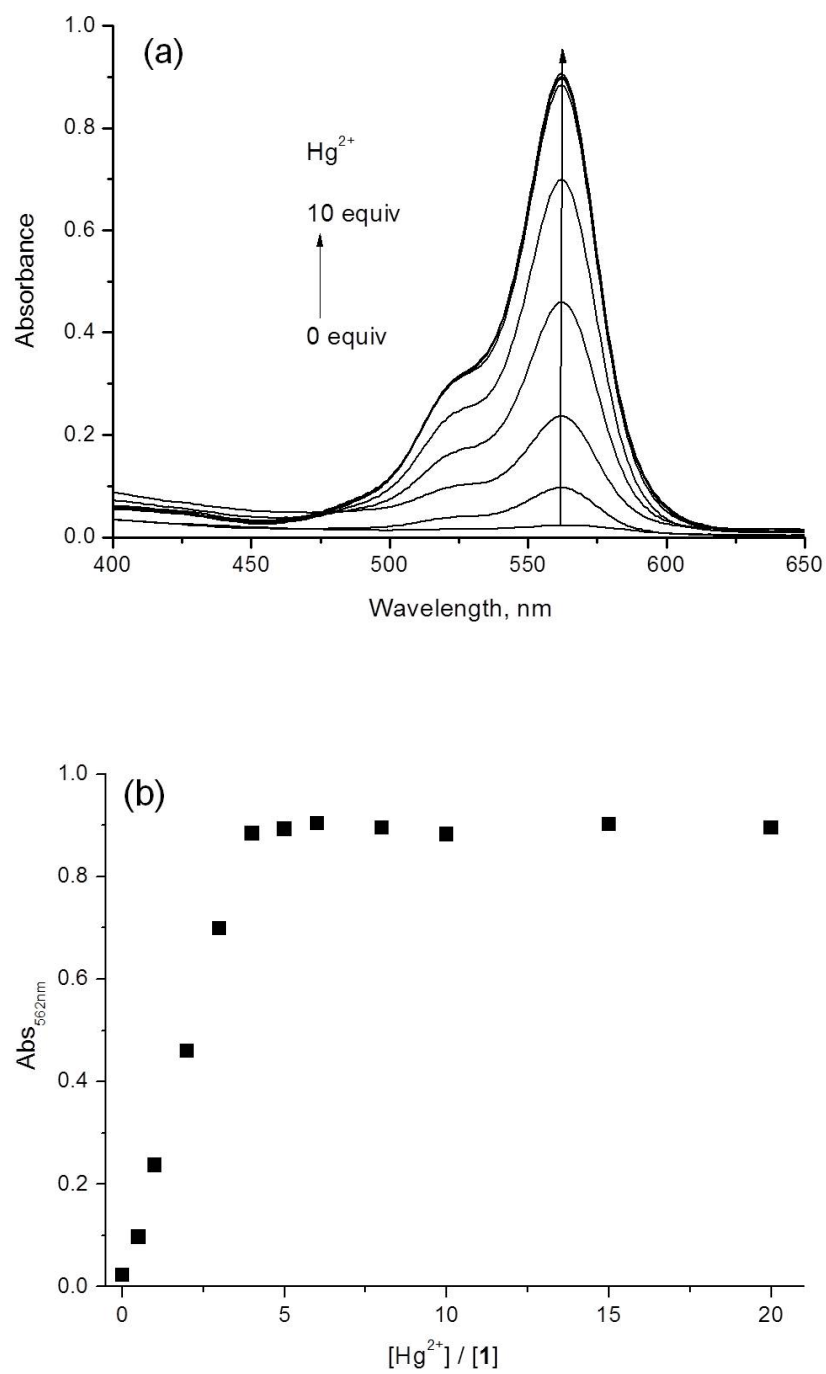

**Figure S3.** Absorption titration (a) and plot of absorbance at 562 nm of **1** (10 μM) to Hg<sup>2+</sup> concentration (b) in HCl-Tris buffer solution (pH = 7.4).

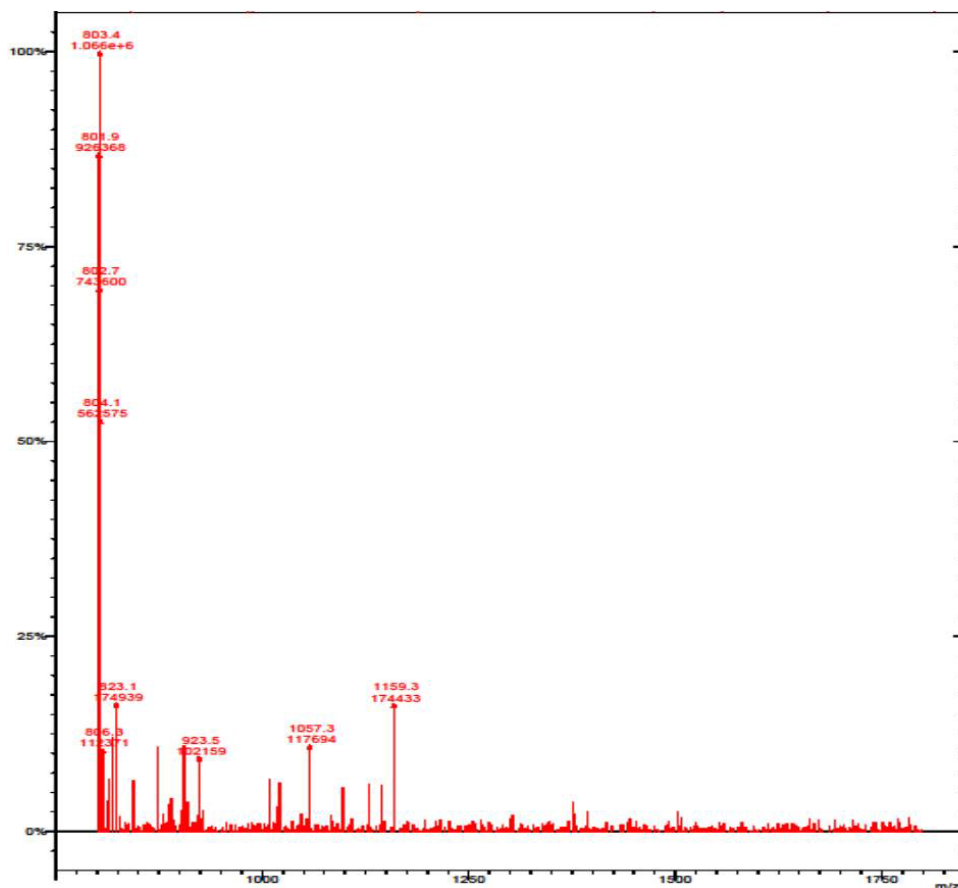

**Figure S4** ESI-MS spectrum of **1** (10  $\mu\text{M}$ ) with 10 equiv.  $\text{Hg}^{2+}$  in HCl-Tris buffer (pH = 7.4).

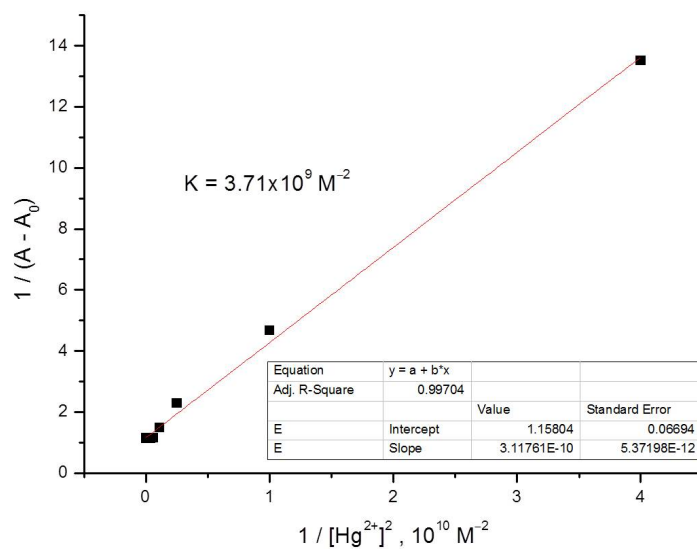

**Figure S5** Benesi-Hildebrand plot (562 nm absorbance) of **1** assuming 1:2 stoichiometry for association between **1** and  $\text{Hg}^{2+}$ .

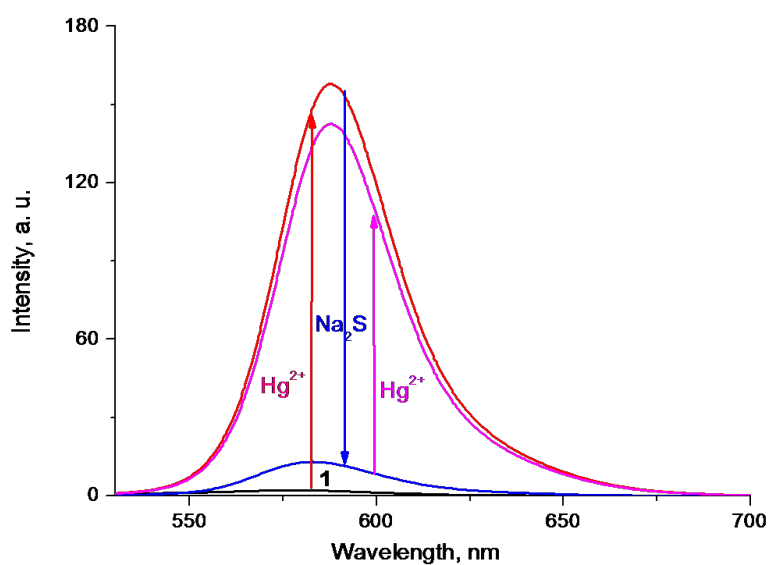

**Figure S6.** Fluorescence spectra of 10  $\mu\text{M}$  **1** in the absence (black curve) and presence of 4 equiv of  $\text{Hg}^{2+}$  (red curve), and further addition of excess (c.a. 10 equiv to  $\text{Hg}^{2+}$ )  $\text{Na}_2\text{S}$  (blue curve) and then 50 equiv of  $\text{Hg}^{2+}$  (magenta curve), respectively, in HCl-Tris buffer (pH = 7.4).

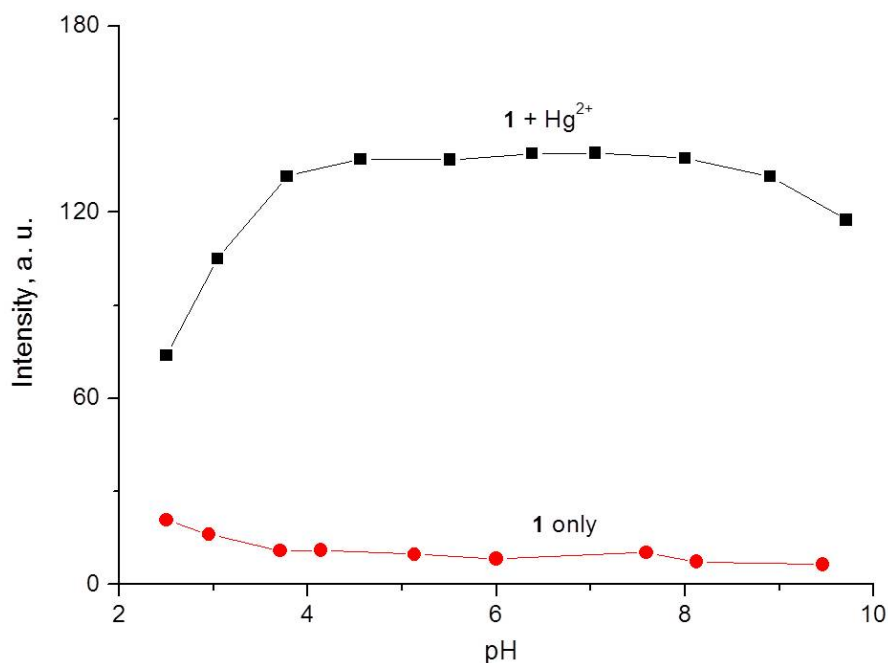

**Figure S7.** The pH effect on the fluorescence of **1** (10  $\mu\text{M}$ ) in the absence and presence of 4equiv.  $\text{Hg}^{2+}$ .

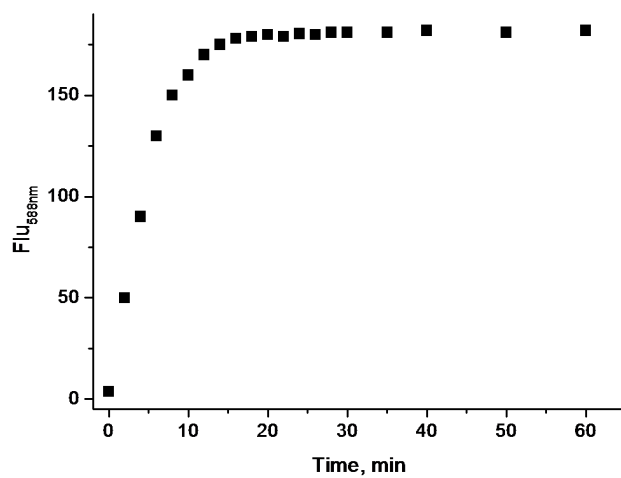

**Figure S8.** The plot of fluorescence intensity at 588 nm of **1** (10  $\mu\text{M}$ ) in the presence of 4equiv.  $\text{Hg}^{2+}$  to response time in HCl-Tris buffer solution (pH = 7.4).

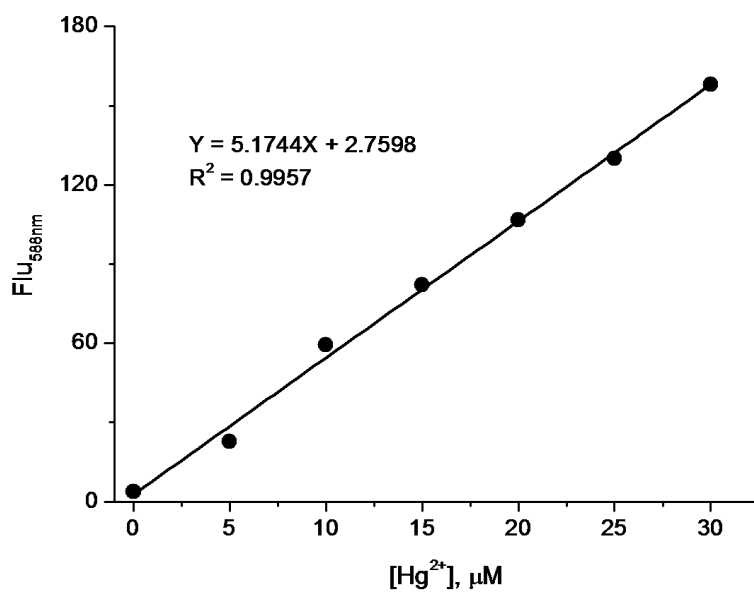

**Figure S9.** The linear relationship between the fluorescence intensity (588 nm) of **1** (10  $\mu\text{M}$ ) and  $\text{Hg}^{2+}$  concentration in HCl-Tris buffer solution (pH = 7.4).

Table S1 Application in tap water for Hg<sup>2+</sup> detection.

| Samples | Added [Hg <sup>2+</sup> ], μM | Detected [Hg <sup>2+</sup> ], μM     | Mean [Hg <sup>2+</sup> ], μM | RSD (%) | Average recovery rate (%) |
|---------|-------------------------------|--------------------------------------|------------------------------|---------|---------------------------|
| 1       | 0.00                          | 0.00, 0.00, 0.00,<br>0.00, 0.00      | 0.00                         | -       | -                         |
| 2       | 1.00                          | 0.99, 0.98, 0.98,<br>1.00, 0.97      | 0.98                         | 1.0     | 98                        |
| 3       | 10.00                         | 10.01, 9.99, 10.01,<br>10.02, 10.00  | 10.01                        | 0.1     | 101                       |
| 4       | 20.00                         | 20.25, 19.90, 20.10,<br>19.86, 20.16 | 20.05                        | 0.7     | 105                       |

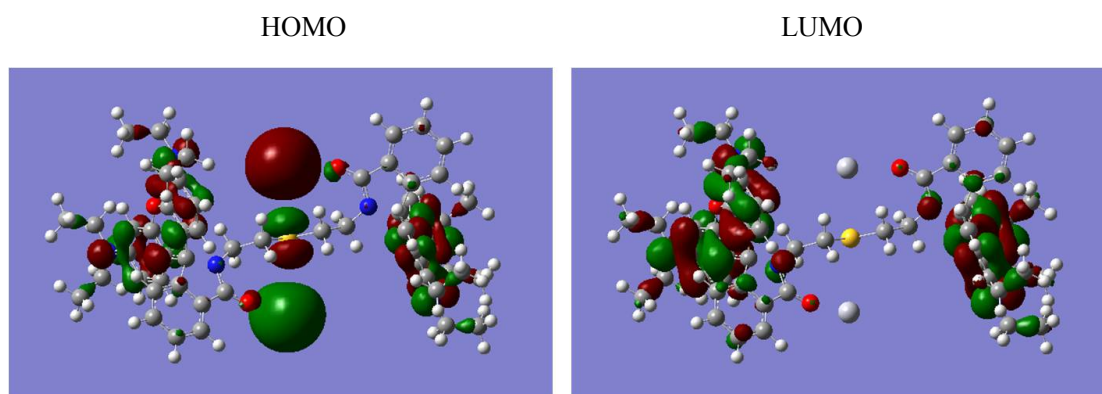

**Fig. S10.** The contours of frontier orbitals of 1-2Hg<sup>2+</sup> complex calculated by DFT method.



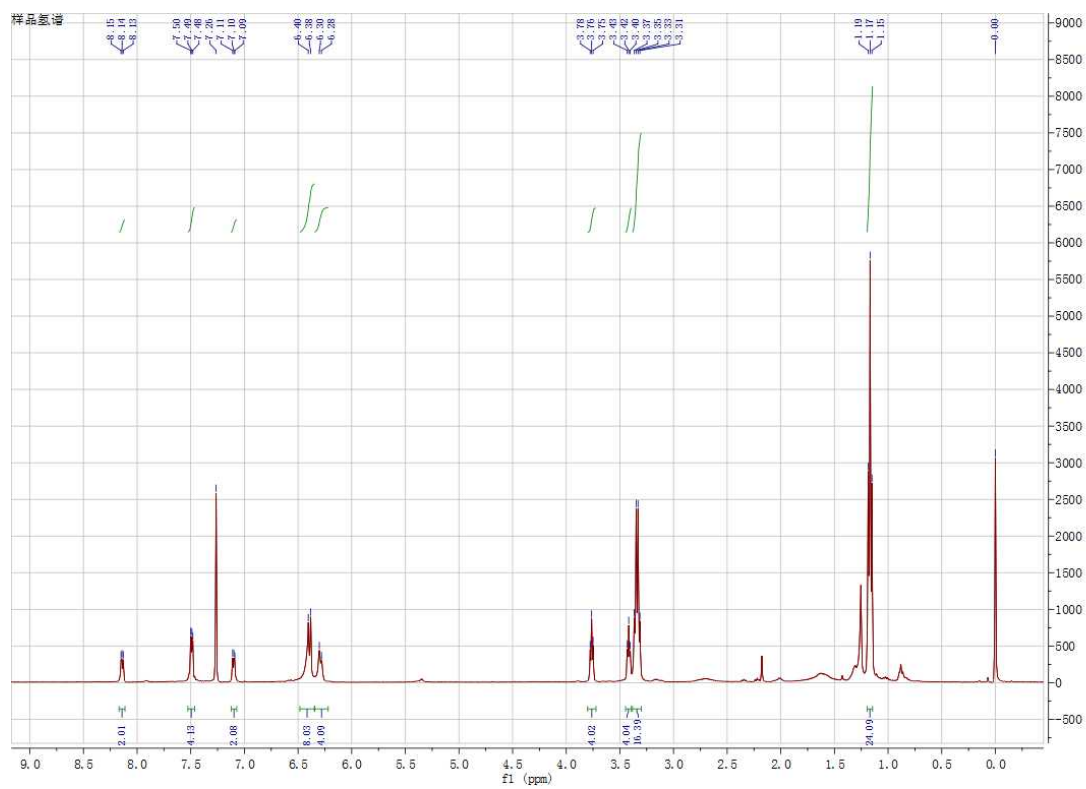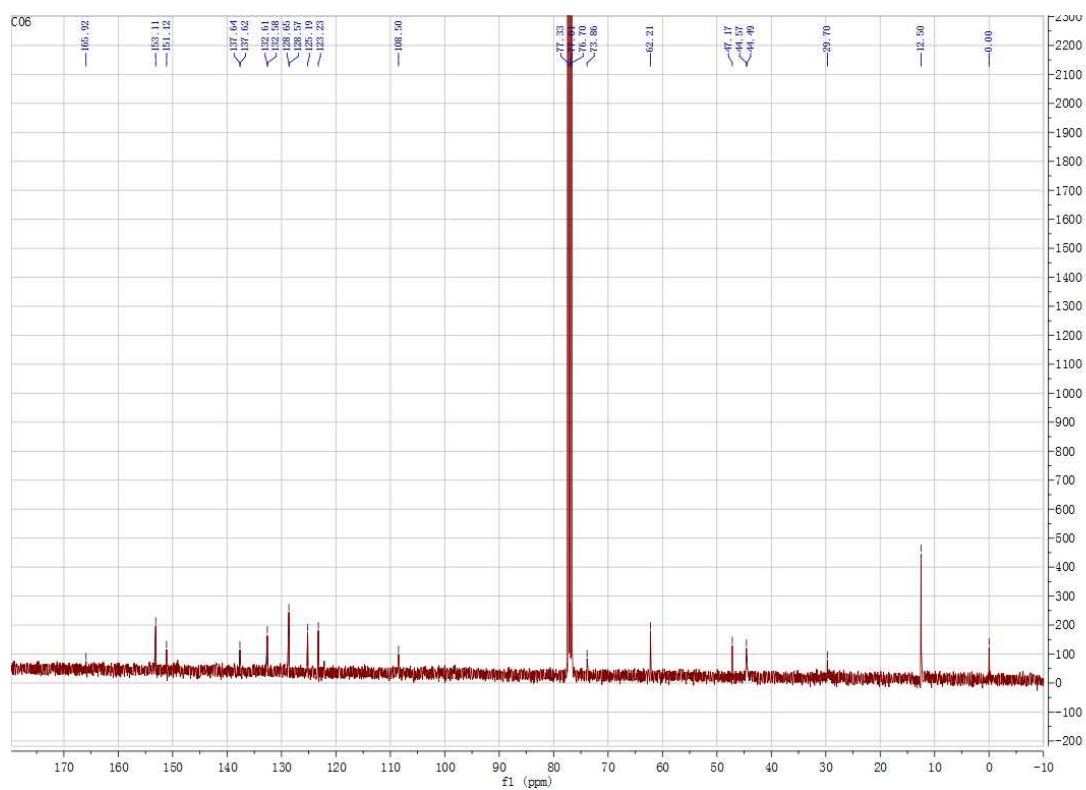

**Figure S11.** <sup>1</sup>H NMR and <sup>13</sup>C NMR spectra of **1** obtained from CDCl<sub>3</sub>.

AB Sciex TOF/TOF™ Series Explorer™ 72024

TOF/TOF™ Reflector Spec #1 MC[BP = 518.1, 66950]

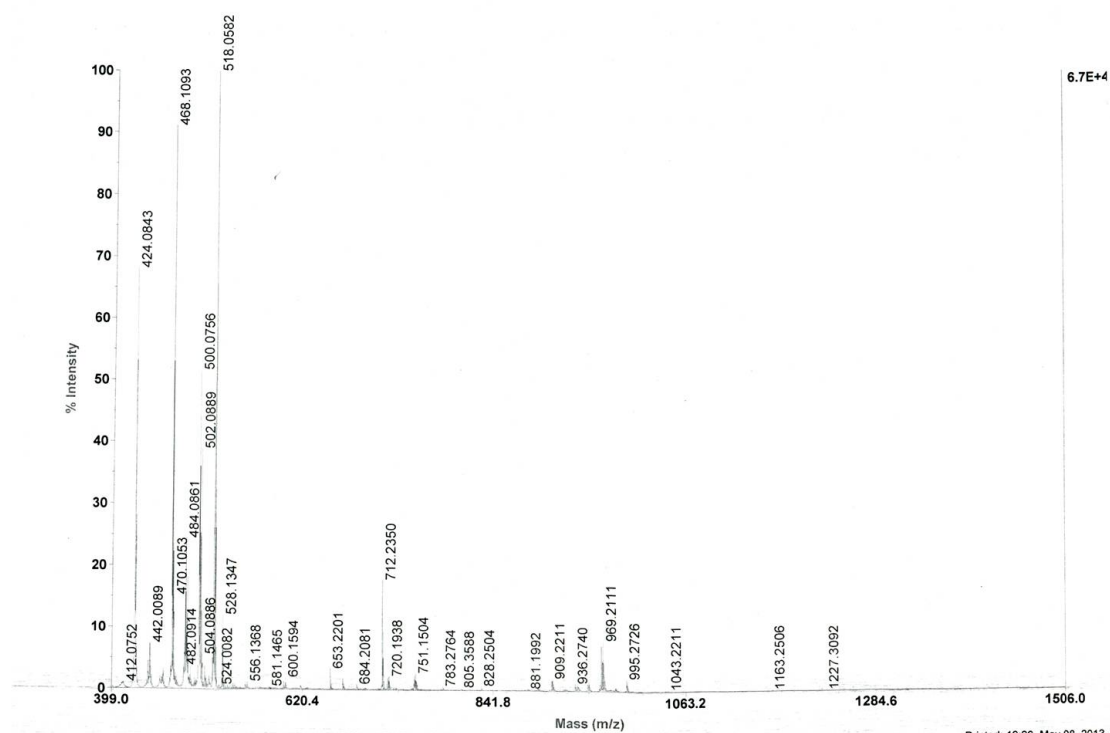

Figure S12. MALDI-TOF-MS spectrum of 1.
